# Supplementary material for: Human Leukocyte Antigen Diversity: A Southern African Perspective
Source: PubMed Central journal article supplement (PMC4549606; doi:10.1155/2015/746151), 2015-08-12
Supplement: 746151.f1.pdf [file 746151.f1.pdf]

HLA allele frequencies for southern Africa all were obtained from the allele frequency.net database (<http://www.allelefreqencies.net/>)

**Frequency (number of individuals with allele)**

| allele        | Mozambique n=202 | Black RSA n=200 | Caucasian RSA n=102 | Natal Tamil RSA n=51 | Natal Zulu RSA n=100 | Tswana RSA n=41 | Lusaka Zambia n=44 | Shona Harare Zimbabwe n=230 |
|---------------|------------------|-----------------|---------------------|----------------------|----------------------|-----------------|--------------------|-----------------------------|
| A*01          | 0.024            |                 |                     |                      | 0.04 (8)             | 0.012 (2.5)     |                    |                             |
| A*01:01       |                  |                 |                     | 0.17                 | 0.04 (8)             |                 | 0.035              | 0.004                       |
| A*01:01:01    |                  | 0.02            | 0.2                 |                      |                      |                 |                    |                             |
| A*01:03       |                  | 0.003           |                     |                      |                      |                 |                    |                             |
| A*02          | 0.151            |                 |                     |                      | 0.115 (23)           | 0.146 (24.4)    |                    |                             |
| A*02:01       |                  |                 |                     | 0.01                 | 0.025 (5)            |                 | 0.128              | 0.091                       |
| A*02:01:01    |                  | 0.083           | 0.26                |                      |                      |                 |                    |                             |
| A*02:02       |                  | 0.023           | 0.01                |                      | 0.035 (7)            |                 | 0.023              | 0.036                       |
| A*02:03       |                  |                 |                     | 0.01                 |                      |                 |                    |                             |
| A*02:05       |                  | 0.068           | 0.005               |                      | 0.055 (11)           |                 |                    | 0.031                       |
| A*02:06       |                  |                 |                     |                      |                      |                 | 0.012              |                             |
| A*02:10       |                  |                 |                     | 0.02                 |                      |                 |                    |                             |
| A*02:11       |                  |                 |                     | 0.13                 |                      |                 |                    |                             |
| A*02:14       |                  | 0.003           |                     |                      |                      |                 | 0.012              |                             |
| A*02:17       |                  |                 | 0.005               |                      |                      |                 |                    | 0.002                       |
| A*03          | 0.057            |                 |                     |                      | 0.06 (12)            | 0.085 (17.1)    |                    |                             |
| A*03:01       |                  |                 |                     | 0.04                 | 0.06 (12)            |                 | 0.058              | 0.04                        |
| A*03:01:01    |                  | 0.065           | 0.12                |                      |                      |                 |                    |                             |
| A*03:02       |                  |                 |                     | 0.01                 |                      |                 |                    |                             |
| A*11          | 0.004            |                 |                     |                      |                      |                 |                    |                             |
| A*11:01       |                  |                 |                     | 0.18                 |                      |                 |                    |                             |
| A*11:01:01    |                  | 0.008           | 0.06                |                      |                      |                 |                    |                             |
| A*11:12       |                  | 0.003           | 0.005               |                      |                      |                 |                    |                             |
| A*23          | 0.112            |                 |                     |                      | 0.1 (20)             | 0.085 (14.6)    |                    |                             |
| A*23:01       |                  | 0.08            | 0.015               |                      | 0.1 (20)             |                 | 0.081              | 0.127                       |
| A*24          | 0.018            |                 |                     |                      | 0.01 (2)             |                 |                    |                             |
| A*24:02       |                  |                 |                     |                      |                      |                 |                    | 0.004                       |
| A*24:02:01    |                  | 0.02            | 0.07                |                      |                      |                 |                    |                             |
| A*24:02:01:01 |                  |                 |                     | 0.16                 | 0.01 (2)             |                 |                    |                             |
| A*24:07       |                  |                 | 0.005               | 0.01                 |                      |                 |                    |                             |
| A*25:01:01    |                  |                 | 0.005               |                      |                      |                 |                    |                             |
| A*26          | 0.004            |                 |                     |                      | 0.01 (2)             | 0.024 (4.9)     |                    |                             |
| A*26:01       |                  | 0.008           | 0.025               | 0.02                 | 0.01 (2)             |                 | 0.012              | 0.016                       |
| A*29          | 0.099            |                 |                     |                      | 0.125 (24)           | 0.122 (24.4)    |                    |                             |
| A*29:01       |                  |                 |                     |                      | 0.015 (3)            |                 |                    | 0.004                       |
| A*29:01:01    |                  | 0.005           |                     |                      |                      |                 |                    |                             |

|            |       |       |       |      |            |              |       |       |
|------------|-------|-------|-------|------|------------|--------------|-------|-------|
| A*29:02    |       |       |       |      | 0.11 (22)  |              | 0.058 | 0.096 |
| A*29:02:01 |       | 0.063 | 0.06  |      |            |              |       |       |
| A*29:11    |       | 0.025 |       |      |            |              |       |       |
| A*30       | 0.239 |       |       |      | 0.195 (36) | 0.159 (31.7) |       |       |
| A*30:01    |       | 0.101 | 0.015 | 0.01 | 0.095 (18) |              | 0.14  | 0.091 |
| A*30:01:02 |       | 0.005 |       |      |            |              |       |       |
| A*30:02    |       | 0.096 | 0.005 |      | 0.085 (17) |              | 0.233 | 0.147 |
| A*30:02:02 |       | 0.005 |       |      |            |              |       |       |
| A*30:04    |       | 0.018 | 0.025 |      | 0.015 (3)  |              |       | 0.011 |
| A*31       |       |       |       |      | 0.005 (1)  | 0.012 (2.4)  |       |       |
| A*31:01:02 |       | 0.003 | 0.015 | 0.07 | 0.005 (1)  |              | 0.035 |       |
| A*31:03    |       |       |       |      |            |              |       | 0.007 |
| A*32       | 0.002 |       |       |      | 0.025 (5)  | 0.012 (2.4)  |       |       |
| A*32:01    |       | 0.013 | 0.03  | 0.01 | 0.025 (5)  |              |       | 0.009 |
| A*32:02    |       |       |       |      |            |              |       | 0.002 |
| A*32:03    |       |       |       |      |            |              |       | 0.004 |
| A*33       | 0.044 |       |       |      | 0.005 (1)  |              |       |       |
| A*33:01    |       | 0.003 | 0.01  |      |            |              | 0.012 |       |
| A*33:03    |       |       |       | 0.07 | 0.005 (1)  |              |       | 0.024 |
| A*33:03:01 |       | 0.018 | 0.005 |      |            |              |       |       |
| A*34       | 0.024 |       |       |      | 0.055 (11) | 0.073 (14.6) |       |       |
| A*34:01    |       |       |       |      |            |              |       | 0.002 |
| A*34:02    |       | 0.035 | 0.02  |      | 0.055 (11) |              | 0.012 | 0.033 |
| A*36       | 0.029 |       |       |      |            | 0.012 (2.4)  |       |       |
| A*36:01    |       | 0.01  |       |      |            |              | 0.035 | 0.029 |
| A*43       | 0.002 |       |       |      | 0.03 (6)   | 0.049 (9.7)  |       |       |
| A*43:01    |       | 0.035 |       |      | 0.03 (6)   |              | 0.012 | 0.004 |
| A*66       | 0.039 |       |       |      | 0.035 (7)  | 0.037 (7.3)  |       |       |
| A*66:01    |       | 0.008 |       |      | 0.02 (4)   |              | 0.012 | 0.038 |
| A*66:02    |       | 0.005 |       |      | 0.015 (3)  |              |       | 0.002 |
| A*66:03    |       |       |       |      |            |              |       | 0.002 |
| A*68       | 0.101 |       |       |      | 0.125 (23) | 0.122 (24.4) |       |       |
| A*68:01    |       |       |       |      |            |              |       | 0.009 |
| A*68:01:01 |       | 0.033 | 0.015 |      | 0.03 (6)   |              |       | 0.004 |
| A*68:01:02 |       |       |       | 0.08 |            |              |       |       |
| A*68:02    |       | 0.085 | 0.01  |      | 0.095 (19) |              | 0.047 | 0.098 |
| A*68:27    |       | 0.005 |       |      |            |              |       |       |
| A*69:01    |       |       | 0.005 |      |            |              |       |       |
| A*74       | 0.044 |       |       |      | 0.065 (13) | 0.037 (4.9)  |       | 0.002 |
| A*74:01    |       | 0.045 |       |      |            |              | 0.023 | 0.027 |

|            |       |       |       |       |            |              |       |       |
|------------|-------|-------|-------|-------|------------|--------------|-------|-------|
| A*80       | 0.007 |       |       |       |            | 0.012 (2.4)  |       |       |
| A*80:01    |       | 0.005 |       |       |            |              | 0.023 | 0.002 |
| B*07       | 0.029 |       |       |       | 0.065 (13) | 0.024 (4.9)  |       |       |
| B*07:02    |       |       |       |       | 0.045 (9)  |              | 0.046 | 0.046 |
| B*07:02:01 |       | 0.046 | 0.149 |       |            |              |       |       |
| B*07:05    |       |       |       | 0.041 | 0.02 (4)   |              | 0.011 |       |
| B*07:06    |       | 0.015 | 0.005 |       |            |              |       |       |
| B*07:12    |       |       |       |       |            |              |       | 0.002 |
| B*08       | 0.077 |       |       |       | 0.075 (14) | 0.037 (4.9)  |       |       |
| B*08:01    |       | 0.064 | 0.133 | 0.071 | 0.075 (14) |              | 0.034 | 0.031 |
| B*08:05    |       |       |       |       |            |              |       | 0.013 |
| B*13       | 0.011 |       |       |       | 0.015 (3)  | 0.061 (12.2) |       |       |
| B*13:01    |       |       |       | 0.061 |            |              |       |       |
| B*13:02    |       | 0.02  | 0.01  |       | 0.015 (3)  |              | 0.011 | 0.022 |
| B*13:04    |       |       |       |       |            |              |       | 0.002 |
| B*14       | 0.038 |       |       |       | 0.065 (13) | 0.061 (12.2) |       |       |
| B*14:01    |       | 0.018 | 0.005 |       | 0.04 (8)   |              | 0.046 | 0.013 |
| B*14:02    |       | 0.015 | 0.021 |       | 0.025 (5)  |              | 0.034 | 0.024 |
| B*14:04    |       |       |       |       |            |              |       | 0.002 |
| B*15       | 0.156 |       |       |       | 0.15 (30)  | 0.159 (26.8) |       |       |
| B*15:01    |       |       |       |       | 0.005 (1)  |              | 0.023 |       |
| B*15:01:01 |       | 0.005 | 0.087 |       |            |              |       |       |
| B*15:02    |       |       | 0.005 | 0.031 |            |              |       |       |
| B*15:03    |       | 0.084 | 0.005 |       | 0.095 (18) |              | 0.057 | 0.077 |
| B*15:05    |       |       |       | 0.02  |            |              |       |       |
| B*15:10    |       | 0.079 | 0.005 |       | 0.085 (16) |              | 0.046 | 0.084 |
| B*15:13    |       |       | 0.005 |       |            |              |       |       |
| B*15:16    |       | 0.02  | 0.005 |       | 0.005 (1)  |              |       | 0.013 |
| B*15:17    |       |       |       | 0.031 |            |              |       | 0.002 |
| B*15:17:01 |       |       | 0.01  |       |            |              |       |       |
| B*15:18    |       |       |       | 0.041 |            |              | 0.011 | 0.002 |
| B*15:24    |       |       | 0.005 |       |            |              |       |       |
| B*15:25    |       |       |       | 0.01  |            |              |       |       |
| B*15:37    |       |       |       |       |            |              |       | 0.004 |
| B*18       | 0.052 |       |       |       | 0.02 (4)   | 0.049 (7.3)  |       |       |
| B*18:01    |       |       |       | 0.031 | 0.02 (4)   |              | 0.034 | 0.064 |
| B*18:01:01 |       | 0.031 | 0.051 |       |            |              |       |       |
| B*18:03    |       |       |       |       |            |              | 0.011 |       |
| B*27       | 0.002 |       |       |       |            |              |       |       |
| B*27:02    |       |       | 0.005 |       |            |              |       |       |
| B*27:05    |       |       | 0.041 | 0.01  |            |              |       |       |

|            |       |       |       |       |            |              |       |       |
|------------|-------|-------|-------|-------|------------|--------------|-------|-------|
| B*35       | 0.05  |       |       |       | 0.04 (8)   | 0.012 (2.4)  |       |       |
| B*35:01    |       |       |       | 0.02  | 0.04 (8)   |              | 0.023 | 0.013 |
| B*35:01:01 |       | 0.018 | 0.062 |       |            |              |       |       |
| B*35:02    |       |       |       |       |            |              |       | 0.002 |
| B*35:03    |       |       |       | 0.071 |            |              |       |       |
| B*35:05    |       |       | 0.005 |       |            |              |       |       |
| B*35:08    |       |       | 0.01  |       |            |              |       |       |
| B*35:20    |       |       |       |       |            |              |       | 0.004 |
| B*37       | 0.002 |       |       |       |            |              |       |       |
| B*37:01    |       |       | 0.01  |       |            |              |       |       |
| B*37:01:01 |       |       |       | 0.02  |            |              |       |       |
| B*38:01    |       |       | 0.015 |       |            |              |       |       |
| B*39       | 0.018 |       |       |       | 0.015 (3)  |              |       |       |
| B*39:10    |       | 0.025 |       |       | 0.015 (3)  |              |       | 0.002 |
| B*40       | 0.005 |       |       |       |            | 0.012 (2.4)  |       |       |
| B*40:01    |       | 0.003 | 0.021 |       |            |              | 0.023 | 0.002 |
| B*40:02    |       |       | 0.01  |       |            |              |       |       |
| B*40:06    |       |       |       | 0.143 |            |              |       |       |
| B*40:06:01 |       |       | 0.005 |       |            |              |       |       |
| B*40:16    |       |       |       |       |            |              |       | 0.002 |
| B*41       | 0.009 |       |       |       | 0.01 (2)   |              |       |       |
| B*41:01    |       | 0.015 | 0.005 |       | 0.005 (1)  |              | 0.011 | 0.004 |
| B*41:02    |       |       |       |       | 0.005 (1)  |              | 0.023 |       |
| B*42       | 0.093 |       |       |       | 0.12 (23)  | 0.085 (17.1) |       |       |
| B*42:01    |       | 0.089 |       |       | 0.12 (23)  |              | 0.148 | 0.069 |
| B*42:02    |       | 0.015 |       |       |            |              |       | 0.011 |
| B*42:06    |       | 0.003 |       |       |            |              |       |       |
| B*44       | 0.079 |       |       |       | 0.105 (20) | 0.111 (22)   |       |       |
| B*44:02:01 |       |       | 0.056 |       |            |              |       |       |
| B*44:03    |       |       |       | 0.051 | 0.105 (20) |              | 0.023 | 0.058 |
| B*44:03:01 |       | 0.025 | 0.056 |       |            |              |       | 0.013 |
| B*44:03:02 |       | 0.033 | 0.015 |       |            |              |       |       |
| B*44:04    |       |       | 0.005 |       |            |              |       |       |
| B*44:05    |       |       | 0.01  |       |            |              | 0.011 |       |
| B*44:07    |       |       |       | 0.01  |            |              |       |       |
| B*44:27    |       |       | 0.005 |       |            |              |       |       |
| B*45       | 0.061 |       |       |       | 0.035 (7)  | 0.11 (19.5)  |       |       |
| B*45:01    |       | 0.064 | 0.005 |       | 0.035 (7)  |              | 0.046 | 0.093 |
| B*45:07    |       | 0.005 |       |       |            |              |       |       |
| B*47:01    |       |       |       |       |            |              | 0.011 |       |
| B*49       | 0.005 |       |       |       | 0.01 (2)   |              |       |       |
| B*49:01    |       | 0.008 | 0.005 |       | 0.01 (2)   |              | 0.011 | 0.009 |
| B*50       | 0.005 |       |       |       |            | 0.012 (2.4)  |       |       |

|            |       |       |       |       |            |             |       |       |
|------------|-------|-------|-------|-------|------------|-------------|-------|-------|
| B*50:01    |       |       | 0.005 | 0.01  |            |             |       | 0.007 |
| B*50:02    |       |       |       |       |            |             |       | 0.002 |
| B*51       | 0.005 |       |       |       |            |             |       |       |
| B*51:01    |       |       |       |       |            |             | 0.057 | 0.004 |
| B*51:01:01 |       | 0.01  | 0.046 | 0.092 |            |             |       |       |
| B*51:06    |       |       |       | 0.02  |            |             |       |       |
| B*52       | 0.005 |       |       |       |            |             |       |       |
| B*52:01    |       |       |       |       |            |             |       |       |
| B*52:01:01 |       |       | 0.01  | 0.082 |            |             |       |       |
| B*53       | 0.081 |       |       |       | 0.015 (3)  | 0.012 (2.4) |       |       |
| B*53:01    |       | 0.043 |       |       | 0.015 (3)  |             | 0.102 | 0.093 |
| B*55:01    |       |       | 0.015 |       |            |             |       |       |
| B*56:01    |       |       |       | 0.01  |            |             |       |       |
| B*57       | 0.05  |       |       |       | 0.05 (9)   |             |       |       |
| B*57:01    |       |       |       | 0.102 |            |             | 0.011 | 0.004 |
| B*57:01:01 |       |       | 0.041 |       |            |             |       |       |
| B*57:02    |       | 0.015 |       |       | 0.01 (2)   |             | 0.023 | 0.007 |
| B*57:03    |       |       |       |       | 0.04 (4)   |             | 0.057 | 0.044 |
| B*57:03:01 |       | 0.023 |       |       |            |             |       |       |
| B*58       | 0.133 |       |       |       | 0.145 (28) | 0.22 (39)   |       |       |
| B*58:01    |       | 0.081 | 0.026 | 0.02  | 0.04 (8)   |             |       | 0.044 |
| B*58:02    |       | 0.094 | 0.005 |       | 0.085 (17) |             | 0.023 | 0.064 |
| B*67       |       |       |       |       | 0.005 (1)  |             |       |       |
| B*67:01    |       |       |       |       | 0.005 (1)  |             |       |       |
| B*73       | 0.002 |       |       |       |            |             |       |       |
| B*73:01    |       |       |       |       |            |             |       | 0.002 |
| B*81       | 0.029 |       |       |       | 0.035 (7)  | 0.037 (7.3) |       |       |
| B*81:01    |       | 0.033 |       |       | 0.035 (7)  |             | 0.023 | 0.04  |
| B*82       | 0.002 |       |       |       | 0.005 (1)  |             |       |       |
| B*82:01    |       |       |       |       | 0.005 (1)  |             |       |       |
| C*01:02    |       |       | 0.02  | 0.021 |            |             |       |       |
| C*02:02    |       | 0.091 | 0.069 |       |            |             | 0.1   | 0.082 |
| C*02:02:01 |       |       |       | 0.01  |            |             |       |       |
| C*02:05    |       | 0.003 | 0.005 |       |            |             |       |       |
| C*02:10    |       |       |       |       |            |             |       | 0.029 |
| C*03:02    |       | 0.015 |       | 0.021 |            |             |       | 0.011 |
| C*03:03    |       | 0.003 | 0.059 | 0.042 |            |             | 0.022 | 0.009 |
| C*03:04    |       | 0.051 | 0.054 |       |            |             | 0.067 | 0.064 |
| C*03:04:01 |       |       |       |       |            |             |       | 0.002 |
| C*03:04:02 |       |       |       |       |            |             |       | 0.018 |
| C*03:16    |       |       | 0.005 |       |            |             |       |       |
| C*04:01    |       | 0.119 | 0.088 | 0.042 |            |             | 0.144 | 0.148 |
| C*04:03    |       |       |       | 0.031 |            |             |       |       |
| C*04:04    |       | 0.005 |       |       |            |             |       |       |
| C*04:07    |       |       |       | 0.042 |            |             |       | 0.015 |

|            |  |       |       |       |  |  |       |       |
|------------|--|-------|-------|-------|--|--|-------|-------|
| C*04:08    |  |       | 0.005 |       |  |  |       |       |
| C*04:09N   |  |       | 0.005 |       |  |  |       |       |
| C*05:01    |  |       |       |       |  |  |       | 0.007 |
| C*05:01:01 |  | 0.008 | 0.054 |       |  |  |       |       |
| C*06:02    |  | 0.149 | 0.078 | 0.177 |  |  | 0.033 | 0.128 |
| C*06:06    |  | 0.003 |       |       |  |  |       |       |
| C*06:11    |  |       | 0.005 |       |  |  |       |       |
| C*07:01    |  | 0.076 | 0.172 | 0.135 |  |  | 0.122 | 0.106 |
| C*07:02    |  |       |       | 0.094 |  |  | 0.044 | 0.046 |
| C*07:02:01 |  | 0.058 | 0.137 |       |  |  |       |       |
| C*07:04    |  | 0.013 | 0.01  | 0.031 |  |  | 0.022 | 0.042 |
| C*07:06    |  | 0.041 | 0.02  |       |  |  |       |       |
| C*07:08    |  |       |       |       |  |  |       | 0.002 |
| C*07:11    |  | 0.003 |       |       |  |  |       |       |
| C*07:12    |  | 0.003 |       |       |  |  |       |       |
| C*07:18    |  | 0.041 | 0.015 |       |  |  |       |       |
| C*07:22    |  |       | 0.005 |       |  |  |       |       |
| C*08:01    |  | 0.003 | 0.005 | 0.042 |  |  |       | 0.029 |
| C*08:02    |  | 0.023 | 0.025 |       |  |  | 0.067 | 0.038 |
| C*08:04    |  | 0.025 | 0.01  |       |  |  |       |       |
| C*12:02    |  |       | 0.01  | 0.083 |  |  |       |       |
| C*12:02:03 |  |       |       | 0.021 |  |  |       |       |
| C*12:03    |  | 0.015 | 0.025 | 0.01  |  |  |       |       |
| C*12:04:02 |  |       |       |       |  |  |       | 0.002 |
| C*14       |  |       |       |       |  |  |       |       |
| C*14:02    |  | 0.01  | 0.01  | 0.021 |  |  |       | 0.004 |
| C*14:03    |  |       |       | 0.021 |  |  |       | 0.004 |
| C*14:04    |  |       | 0.005 |       |  |  |       |       |
| C*15:02    |  | 0.008 | 0.029 | 0.104 |  |  |       |       |
| C*15:05    |  | 0.013 |       |       |  |  |       | 0.002 |
| C*15:07    |  |       |       | 0.01  |  |  |       |       |
| C*16:01    |  | 0.066 | 0.064 | 0.01  |  |  | 0.1   | 0.08  |
| C*16:02    |  |       | 0.01  | 0.031 |  |  |       |       |
| C*17:01    |  | 0.111 | 0.005 |       |  |  | 0.156 | 0.082 |
| C*18:01    |  | 0.015 |       |       |  |  | 0.1   | 0.049 |
| C*18:02    |  | 0.033 |       |       |  |  |       |       |

HLA allele frequencies for southern Africa (\*) were obtained from the allele frequency.net database (<http://www.allelefreqencies.net/>)

(#) were obtained from disease association studies (refs 6 and 66)

**Frequency**

| Allele        | Mozambique<br>n=202* | Black RSA<br>n=200* | Caucasian<br>RSA<br>n=102* | Limpopo<br>Venda<br>RSA<br>n=117* | Shona<br>Harare<br>Zimbabwe<br>n=230* | Botswana<br>n=55# | RSA Tikley<br>n=10# |
|---------------|----------------------|---------------------|----------------------------|-----------------------------------|---------------------------------------|-------------------|---------------------|
| DRB1*01       | 0.051                |                     |                            | 0.103                             |                                       | 16 (0.291)        | 9 (0.08)            |
| DRB1*01:01    |                      | 0.013               | 0.075                      |                                   | 0.02                                  |                   |                     |
| DRB1*01:02    |                      | 0.047               | 0.011                      |                                   | 0.061                                 |                   |                     |
| DRB1*01:03    |                      |                     | 0.021                      |                                   |                                       |                   |                     |
| DRB1*03       | 0.181                |                     |                            |                                   | 0.002                                 | 12 (0.218)        | 35 (0.313)          |
| DRB1*03:01    |                      | 0.076               | 0.122                      | 0.137                             | 0.07                                  |                   |                     |
| DRB1*03:02    |                      | 0.097               | 0.005                      | 0.09                              | 0.066                                 |                   |                     |
| DRB1*03:04    |                      |                     |                            | 0.077                             |                                       |                   |                     |
| DRB1*03:05    |                      |                     |                            |                                   | 0.009                                 |                   |                     |
| DRB1*03:07    |                      | 0.003               |                            |                                   |                                       |                   |                     |
| DRB1*03:18    |                      | 0.005               |                            |                                   |                                       |                   |                     |
| DRB1*04       | 0.021                |                     |                            | 0.064                             |                                       | 7 (0.127)         | 9 (0.08)            |
| DRB1*04:01    |                      | 0.026               | 0.112                      |                                   |                                       |                   |                     |
| DRB1*04:02    |                      | 0.003               |                            |                                   |                                       |                   |                     |
| DRB1*04:03:01 |                      |                     | 0.016                      |                                   |                                       |                   |                     |
| DRB1*04:04    |                      | 0.018               | 0.053                      |                                   | 0.002                                 |                   |                     |
| DRB1*04:05    |                      | 0.005               | 0.011                      |                                   | 0.022                                 |                   |                     |
| DRB1*04:07    |                      | 0.003               | 0.027                      |                                   |                                       |                   |                     |
| DRB1*04:08    |                      |                     | 0.005                      |                                   |                                       |                   |                     |
| DRB1*04:10    |                      | 0.003               |                            |                                   |                                       |                   |                     |
| DRB1*07       | 0.06                 |                     |                            | 0.056                             |                                       | 5 (0.091)         | 14 (0.125)          |
| DRB1*07:01    |                      | 0.071               | 0.096                      |                                   | 0.046                                 |                   |                     |
| DRB1*08       | 0.045                |                     |                            |                                   |                                       | 8 (0.145)         | 10 (0.089)          |
| DRB1*08:01    |                      | 0.005               | 0.011                      |                                   |                                       |                   |                     |
| DRB1*08:02    |                      | 0.003               |                            |                                   |                                       |                   |                     |
| DRB1*08:04    |                      | 0.042               | 0.011                      |                                   | 0.046                                 |                   |                     |
| DRB1*09       | 0.009                |                     |                            |                                   |                                       | 0 (0.0)           | 2 (0.018)           |
| DRB1*09:01    |                      |                     |                            | 0.009                             | 0.015                                 |                   |                     |
| DRB1*09:01:02 |                      | 0.005               | 0.021                      |                                   |                                       |                   |                     |
| DRB1*10       | 0.06                 |                     |                            |                                   |                                       | 4 (0.073)         | 2 (0.018)           |
| DRB1*10:01    |                      | 0.026               |                            | 0.004                             | 0.037                                 |                   |                     |
| DRB1*11       | 0.196                |                     |                            | 0.184                             |                                       | 20 (0.364)        | 41 (0.366)          |
| DRB1*11:01    |                      | 0.116               | 0.059                      |                                   | 0.144                                 |                   |                     |
| DRB1*11:02    |                      | 0.079               |                            |                                   | 0.046                                 |                   |                     |
| DRB1*11:04    |                      | 0.003               | 0.037                      |                                   | 0.007                                 |                   |                     |
| DRB1*11:16    |                      | 0.003               |                            |                                   |                                       |                   |                     |
| DRB1*11:19    |                      | 0.003               |                            |                                   |                                       |                   |                     |
| DRB1*12       | 0.04                 |                     |                            | 0.013                             |                                       | 4 (0.073)         | 11 (0.098)          |
| DRB1*12:01    |                      | 0.026               | 0.011                      |                                   | 0.052                                 |                   |                     |

|               |       |       |       |       |       |            |            |  |
|---------------|-------|-------|-------|-------|-------|------------|------------|--|
| DRB1*12:02    |       |       | 0.005 |       | 0.007 |            |            |  |
| DRB1*12:03:02 |       |       |       |       | 0.004 |            |            |  |
| DRB1*12:04    |       |       |       |       | 0.002 |            |            |  |
| DRB1*13       | 0.198 |       |       |       | 0.002 | 16 (0.291) | 39 (0.348) |  |
| DRB1*13:01    |       | 0.124 | 0.064 | 0.128 | 0.085 |            |            |  |
| DRB1*13:02    |       | 0.058 | 0.037 | 0.03  | 0.066 |            |            |  |
| DRB1*13:03    |       | 0.018 | 0.016 |       | 0.009 |            |            |  |
| DRB1*14       | 0.013 |       |       |       |       |            | 1 (0.009)  |  |
| DRB1*14:01    |       | 0.008 | 0.027 |       | 0.015 |            |            |  |
| DRB1*14:04    |       |       | 0.005 |       |       |            |            |  |
| DRB1*14:15    |       |       |       |       | 0.002 |            |            |  |
| DRB1*15       | 0.126 |       |       | 0.073 |       |            |            |  |
| DRB1*15:01    |       | 0.024 | 0.112 |       | 0.002 |            |            |  |
| DRB1*15:03    |       | 0.084 | 0.011 |       | 0.153 |            |            |  |
| DRB1*15:07    |       |       | 0.005 |       |       |            |            |  |
| DRB1*16       | 0.002 |       |       | 0.034 |       |            |            |  |
| DRB1*16:01    |       |       | 0.016 |       |       |            |            |  |
| DRB1*16:02    |       | 0.003 |       |       | 0.009 |            |            |  |
| DRB3*01       |       |       |       |       |       | 19 (0.345) |            |  |
| DRB3*02       |       |       |       |       |       | 18 (0.327) |            |  |
| DRB3*03       |       |       |       |       |       | 16 (0.291) |            |  |
| DRB4*01       |       |       |       |       |       | 9 (0.164)  |            |  |
| DRB5*01       |       |       |       |       |       | 12 (0.218) |            |  |
| DQB1*02       |       |       |       | 0.111 |       | 7 (0.127)  | 26 (0.262) |  |
| DQB1*02:01    |       |       |       |       | 0.133 |            |            |  |
| DQB1*03       |       |       |       | 0.124 |       | 22 (0.40)  |            |  |
| DQB1*03:01    |       |       |       |       | 0.14  |            |            |  |
| DQB1*03:02    |       |       |       |       | 0.022 |            |            |  |
| DQB1*03:03    |       |       |       |       | 0.009 |            |            |  |
| DQB1*04       |       |       |       | 0.094 |       | 13 (0.236) | 19 (0.192) |  |
| DQB1*04:02    |       |       |       |       | 0.094 |            |            |  |
| DQB1*05       |       |       |       | 0.235 |       | 13 (0.236) | 30 (0.303) |  |
| DQB1*05:01    |       |       |       |       | 0.227 |            |            |  |
| DQB1*05:02    |       |       |       |       | 0.011 |            |            |  |
| DQB1*05:03    |       |       |       |       | 0.007 |            |            |  |
| DQB1*06       |       |       |       | 0.437 |       | 28 (0.509) | 55 (0.555) |  |
| DQB1*06:02    |       |       |       |       | 0.247 |            | 27 (0.31)  |  |
| DQB1*06:03    |       |       |       |       | 0.052 |            | 8 (0.092)  |  |
| DQB1*06:04    |       |       |       |       | 0.024 |            |            |  |
| DQB1*06:08    |       |       |       |       | 0.002 |            |            |  |
| DQB1*06:09    |       |       |       |       | 0.022 |            |            |  |
| DQB1*06:13    |       |       |       |       | 0.009 |            |            |  |
| DQB1*06:15    |       |       |       |       | 0.002 |            |            |  |
| DQB1*07       |       |       |       |       |       |            | 29 (0.293) |  |
| DQB1*08       |       |       |       |       |       |            | 5 (0.05)   |  |
| DQA1*01:01    |       |       |       |       | 0.197 |            |            |  |
| DQA1*01:02    |       |       |       |       | 0.343 |            |            |  |



|               |  |  |  |  |       |  |           |  |
|---------------|--|--|--|--|-------|--|-----------|--|
| DQA1*01:03    |  |  |  |  | 0.066 |  |           |  |
| DQA1*02:01    |  |  |  |  | 0.037 |  |           |  |
| DQA1*03:01:01 |  |  |  |  | 0.059 |  |           |  |
| DQA1*04:01    |  |  |  |  | 0.111 |  |           |  |
| DQA1*05:01    |  |  |  |  | 0.183 |  |           |  |
| DQA1*05:02    |  |  |  |  | 0.004 |  |           |  |
| DPB1*01:01:01 |  |  |  |  | 0.355 |  |           |  |
| DPB1*01:01:02 |  |  |  |  | 0.002 |  |           |  |
| DPB1*02:01:02 |  |  |  |  | 0.107 |  |           |  |
| DPB1*02:02    |  |  |  |  | 0.002 |  |           |  |
| DPB1*03:01    |  |  |  |  | 0.064 |  |           |  |
| DPB1*04:01    |  |  |  |  | 0.031 |  |           |  |
| DPB1*04:02    |  |  |  |  | 0.178 |  |           |  |
| DPB1*11:01    |  |  |  |  | 0.018 |  |           |  |
| DPB1*13:01    |  |  |  |  | 0.044 |  | 9 (0.148) |  |
| DPB1*14:01    |  |  |  |  | 0.011 |  |           |  |
| DPB1*15:01    |  |  |  |  | 0.007 |  |           |  |
| DPB1*17:01    |  |  |  |  | 0.031 |  |           |  |
| DPB1*18:01    |  |  |  |  | 0.099 |  |           |  |
| DPB1*19:01    |  |  |  |  | 0.013 |  |           |  |
| DPB1*34:01    |  |  |  |  | 0.004 |  |           |  |
| DPB1*39:01    |  |  |  |  | 0.013 |  |           |  |
| DPB1*55:01    |  |  |  |  | 0.011 |  |           |  |
| DPB1*62:01    |  |  |  |  | 0.002 |  |           |  |
| DPB1*65:01    |  |  |  |  | 0.002 |  |           |  |
| DPB1*75:01    |  |  |  |  | 0.004 |  |           |  |
| DPB1*80:01    |  |  |  |  | 0.002 |  |           |  |
